# Supplementary material for: COVID-19 Impact: A Case Study at the School of Agricultural Engineering and Environment of the Universitat Politècnica de València
Source: MDPI journal article supplement (doi:10.3390/su141710607), 2022-08-25
Supplement: s1 [file s1]

### Supplementary Materials

“COVID-19 impact: a case study at the School of Agricultural Engineering and Environment of the Universitat Politècnica de València”

Clemente, G.; Garcia-Prats, A.; Lisón, P.; Rubio, C.; Vidal-Puig, S.; Ricarte, B.; Estruch-Guitart, V.; Fenollosa, L.; Manzano, J.; Rovira-Más, F.; Vargas, M.; San Bautista, A.

**Table S1.** Variance Analysis of the marks obtained by all the ETSIAMN students during a period of four academic years (2016-2020) and two semesters. Type III Sum of Squares. All F-ratios are based on the average square of residual error.

| Source            | Sum of Squares | DF | Mean Square | F-ratio | P-value |
|-------------------|----------------|----|-------------|---------|---------|
| PRINCIPAL EFFECTS |                |    |             |         |         |
| A: course level   | 16.9187        | 3  | 5.63956     | 127.48  | 0.0000  |
| B: semester       | 3.94745        | 1  | 3.94745     | 89.23   | 0.0000  |
| C: academic year  | 0.277618       | 1  | 0.277618    | 6.28    | 0.0174  |
| D: degree         | 29.4408        | 3  | 9.81358     | 221.82  | 0.0000  |
| INTERACTIONS      |                |    |             |         |         |
| AB                | 0.344271       | 3  | 0.114757    | 2.59    | 0.0691  |
| AC                | 0.0818163      | 3  | 0.0272721   | 0.62    | 0.6092  |
| AD                | 6.54603        | 9  | 0.727336    | 16.44   | 0.0000  |
| BC                | 0.616701       | 1  | 0.616701    | 13.94   | 0.0007  |
| BD                | 0.562681       | 3  | 0.18756     | 4.24    | 0.0122  |
| CD                | 0.139687       | 3  | 0.0465623   | 1.05    | 0.3824  |
| RESIDUES          | 1.45993        | 33 | 0.0442402   |         |         |
| TOTAL (Corrected) | 60.3356        | 63 |             |         |         |

**Table S2A.** Frequency table for the grades of Biotechnology degree students during the first semester..

|            | No-show | Failed | Pass C | B    | A    | A +  | Total per row |
|------------|---------|--------|--------|------|------|------|---------------|
| 2016_2019  | 45      | 113    | 1047   | 3577 | 1364 | 232  | 6378          |
| 2019_2020  | 23      | 39     | 380    | 1086 | 439  | 62   | 2029          |
| Chi-square | 3.48    | 0.20   | 4.85   | 1.82 | 0.04 | 1.49 |               |

**Table S2B.** Tests of homogeneity for the marks' of Biotechnology degree students during the first semester.

| Test       | Statistics | G1 | P-value |
|------------|------------|----|---------|
| Chi-square | 11.882     | 5  | 0.0364  |

**Table S3A.** Frequency table for' the grades of Biotechnology degree students during the second semester.

|            | No-show | Failed | Pass C | B    | A     | A +  | Total per row |
|------------|---------|--------|--------|------|-------|------|---------------|
| 2016_2019  | 87      | 106    | 985    | 3553 | 1401  | 301  | 6433          |
| 2019_2020  | 21      | 17     | 219    | 1080 | 589   | 86   | 2012          |
| Chi-square | 1.14    | 6.79   | 21.07  | 0.67 | 36.55 | 0.55 |               |

**Table S3B.** Tests of homogeneity for the marks of Biotechnology degree students during the second semester.

| Test       | Statistics | G1 | P-value |
|------------|------------|----|---------|
| Chi-square | 66.761     | 5  | 0.0000  |

**Table S4.** Variance Analysis of the marks of Biotechnology degree students during a period of four academic years (2016-2020) and two semesters. Type III Sum of Squares. All F-ratios are based on the average square of residual error.

| Source            | Sum of Squares | DF | Mean Square | F-ratio | P-value |
|-------------------|----------------|----|-------------|---------|---------|
| PRINCIPAL EFFECTS |                |    |             |         |         |
| A: course level   | 2.90497        | 3  | 0.968324    | 81.28   | 0.0000  |
| B: semester       | 0.137468       | 1  | 0.137468    | 11.54   | 0.0079  |
| C: academic year  | 0.0355565      | 3  | 0.0118522   | 0.99    | 0.4384  |
| INTERACTIONS      |                |    |             |         |         |
| AB                | 0.303881       | 3  | 0.101294    | 8.5     | 0.0054  |
| AC                | 0.151195       | 9  | 0.0167995   | 1.41    | 0.3085  |
| BC                | 0.134942       | 3  | 0.0449806   | 3.78    | 0.0528  |
| RESIDUES          | 0.107227       | 9  | 0.0119141   |         |         |
| TOTAL (Corrected) | 3.77524        | 31 |             |         |         |

**Table S5A.** Frequency table for' the grades of Food Science and Technology degree students during the first semester.

|            | No-show | Failed | Pass C | B    | A    | A + | Total per row |
|------------|---------|--------|--------|------|------|-----|---------------|
| 2016_2019  | 73      | 403    | 2025   | 1843 | 185  | 66  | 4595          |
| 2019_2020  | 20      | 117    | 633    | 584  | 42   | 20  | 1416          |
| Chi-square | 0.22    | 0.33   | 0.10   | 0.34 | 3.22 | 0   |               |

**Table S5B.** Tests of homogeneity for' the marks of Food Science and Technology degree students during the first semester.

| Test       | Statistics | Gl | P-value |
|------------|------------|----|---------|
| Chi-square | 4.208      | 5  | 0.5199  |

**Table S6A.** Frequency table for' the grades of Food Science and Technology degree students during the second semester

|            | No-show | Failed | Pass C | B     | A    | A +  | Total per row |
|------------|---------|--------|--------|-------|------|------|---------------|
| 2016_2019  | 99      | 198    | 1754   | 1891  | 411  | 89   | 4442          |
| 2019_2020  | 24      | 23     | 456    | 731   | 139  | 25   | 1398          |
| Chi-square | 1.33    | 22.22  | 13.25  | 22.36 | 0.54 | 0.25 |               |

**Table S6B.** Tests of homogeneity for' the marks of Food Science and Technology degree students during the second semester.

| Test       | Statistics | Gl | P-value |
|------------|------------|----|---------|
| Chi-square | 59.961     | 5  | 0.0000  |

**Table S7.** Variance Analysis of the marks of Food Science and Technology degree students during a period of four academic years (2016-2020) and two semesters. Type III Sum of Squares. All F-ratios are based on the average square of residual error.

| Source            | Sum of Squares | DF | Mean Square | F-ratio | P-value |
|-------------------|----------------|----|-------------|---------|---------|
| PRINCIPAL EFFECTS |                |    |             |         |         |
| A: course level   | 5.01655        | 3  | 1.67218     | 93.25   | 0.0000  |
| B: semester       | 1.96544        | 1  | 1.96544     | 109.6   | 0.0000  |
| C: academic year  | 0.388805       | 3  | 0.129602    | 7.23    | 0.0090  |
| INTERACTIONS      |                |    |             |         |         |
| AB                | 0.905974       | 3  | 0.301991    | 16.84   | 0.0005  |
| AC                | 0.391544       | 9  | 0.0435049   | 2.43    | 0.1014  |
| BC                | 0.183285       | 3  | 0.061095    | 3.41    | 0.0667  |
| RESIDUES          | 0.161394       | 9  | 0.0179327   |         |         |
| TOTAL (Corrected) | 9.013          | 31 |             |         |         |

**Table S8A.** Frequency table for' the grades of Forestry Engineering degree students during the first semester.

|            | No-show | Failed | Pass C | B    | A   | A +  | Total per row |
|------------|---------|--------|--------|------|-----|------|---------------|
| 2016_2019  | 154     | 451    | 955    | 585  | 48  | 24   | 2217          |
| 2019_2020  | 62      | 124    | 252    | 166  | 7   | 3    | 614           |
| Chi-square | 6.26    | 0      | 0.47   | 0.08 | 2.6 | 1.78 |               |

**Table S8B.** Tests of homogeneity for' the marks of Forestry Engineering degree students during the first semester.

| Test       | Statistics | Gl | P-value |
|------------|------------|----|---------|
| Chi-square | 11.186     | 5  | 0.0478  |

**Table S9A.** Frequency table for' the grades of Forestry Engineering degree students during the second semester.

|            | No-show | Failed | Pass C | B    | A   | A +  | Total per row |
|------------|---------|--------|--------|------|-----|------|---------------|
| 2016_2019  | 203     | 248    | 730    | 627  | 119 | 50   | 1977          |
| 2019_2020  | 46      | 58     | 207    | 171  | 35  | 6    | 523           |
| Chi-square | 0.9     | 0.72   | 0.77   | 0.13 | 0.3 | 3.53 |               |

**Table S9B.** Tests of homogeneity for' the marks of Forestry Engineering degree students during the first semester.

| Test       | Statistics | Gl | P-value |
|------------|------------|----|---------|
| Chi-square | 6.348      | 5  | 0.2739  |

**Table S10.** Variance Analysis of the marks of Forestry Engineering degree students during a period of four academic years (2016-2020) and two semesters. Type III Sum of Squares. All F-ratios are based on the average square of residual error.

| Source               | Sum of Squares | DF | Mean Square | F-ratio | P-value |
|----------------------|----------------|----|-------------|---------|---------|
| PRINCIPAL EFFECTS    |                |    |             |         |         |
| A: course level      | 26.4886        | 3  | 8.82953     | 219.03  | 0.0000  |
| B: semester          | 1.91177        | 1  | 1.91177     | 47.42   | 0.0001  |
| C: academic year     | 0.0832832      | 3  | 0.0277611   | 0.69    | 0.5814  |
| INTERACTIONS         |                |    |             |         |         |
| AB                   | 0.0931546      | 3  | 0.0310515   | 0.77    | 0.5391  |
| AC                   | 0.612985       | 9  | 0.0681095   | 1.69    | 0.2233  |
| BC                   | 0.0834126      | 3  | 0.0278042   | 0.69    | 0.5808  |
| RESIDUES             | 0.36281        | 9  | 0.0403123   |         |         |
| TOTAL<br>(Corrected) | 29.636         | 31 |             |         |         |

**Table S11A.** Frequency table for' the grades of Agricultural and Biological Engineering degree students during the first semester.

|            | No-show | Failed | Pass C | B     | A   | A +  | Total per row |
|------------|---------|--------|--------|-------|-----|------|---------------|
| 2016_2019  | 295     | 1257   | 3211   | 1529  | 206 | 63   | 6561          |
| 2019_2020  | 144     | 422    | 994    | 305   | 67  | 21   | 1953          |
| Chi-square | 24.16   | 4.58   | 1.17   | 41.29 | 0.4 | 0.21 | 24.16         |

**Table S11B.** Tests of homogeneity for' the marks of Agricultural and Biological Engineering degree students during the first semester.

| Test       | Statistics | G1 | P-value |
|------------|------------|----|---------|
| Chi-square | 71.79      | 5  | 0.0000  |

**Table S12A.** Frequency table for' the grades of Agricultural and Biological Engineering degree students during the second semester.

|            | No-show | Failed | Pass C | B      | A     | A +  | Total per row |
|------------|---------|--------|--------|--------|-------|------|---------------|
| 2016_2019  | 449     | 885    | 2732   | 1729   | 208   | 108  | 6111          |
| 2019_2020  | 99      | 124    | 670    | 795    | 102   | 39   | 1829          |
| Chi-square | 7.64    | 65.72  | 21.41  | 101.95 | 17.02 | 1.01 | 7.64          |

**Table S12B.** Tests of homogeneity for the marks of Agricultural and Biological Engineering degree students during the second semester.

| Test       | Statistics | G1 | P-value |
|------------|------------|----|---------|
| Chi-square | 214.761    | 5  | 0.0000  |



**Table S13.** Variance Analysis of the marks of Agricultural and Biological Engineering degree students during a period of four academic years (2016-2020) and two semesters. Type III Sum of Squares. All F-ratios are based on the average square of residual error.

| Source            | Sum of Squares | DF | Mean Square | F-ratio | P-value |
|-------------------|----------------|----|-------------|---------|---------|
| PRINCIPAL EFFECTS |                |    |             |         |         |
| A: course level   | 13.5981        | 3  | 4.53271     | 99.41   | 0.0000  |
| B: semester       | 1.83226        | 1  | 1.83226     | 40.19   | 0.0001  |
| C: academic year  | 0.37299        | 3  | 0.124329    | 2.73    | 0.1063  |
| INTERACTIONS      |                |    |             |         |         |
| AB                | 0.15831        | 3  | 0.052771    | 1.16    | 0.3782  |
| AC                | 0.6269         | 9  | 0.069655    | 1.53    | 0.2689  |
| BC                | 1.37516        | 3  | 0.458387    | 10.05   | 0.0031  |
| RESIDUES          | 0.41036        | 9  | 0.045595    |         |         |
| TOTAL (Corrected) | 18.3741        | 31 |             |         |         |
