# Supplementary material for: COVID-19 Impact: A Case Study at the School of Agricultural Engineering and Environment of the Universitat Politècnica de València
Source: MDPI journal article supplement (doi:10.3390/su141710607), 2022-08-25
Supplement: s1 [file s1]

Archive with 1 entries (1 files):
- sustainability-1815196-supplementary.pdf
